# Supplementary material for: Supramolecular gel formation regulated by water content in organic solvents: self-assembly mechanism and biomedical applications
Source: Royal Society of Chemistry journal article supplement (doi:10.1039/d1ra00647a), 2021-01-01
Supplement: d1ra00647a1.pdf [file d1ra00647a1.pdf]

## **Electronic Supplementary Information (ESI)**

### **Supramolecular gel formation regulated by water content in organic solvents: self-assembly mechanism and biomedical applications**

Lieqiang Liao,<sup>ab‡</sup> Xinjian Jia,<sup>b‡</sup> Haoxiang Lou,<sup>b</sup> Jinlian Zhong,<sup>b</sup> Huijin Liu,<sup>b</sup>  
Shunming Ding,<sup>a</sup> Chao Chen,<sup>\*a</sup> Sanguo Hong<sup>\*a</sup> and Xuzhong Luo<sup>\*b</sup>

<sup>a</sup> Key Laboratory of Jiangxi Province for Environment and Energy Catalysis, College  
of Chemistry, Nanchang University, Nanchang 330031, P. R. China. E-mail:  
chaochen@ncu.edu.cn; hongsguo2020@163.com

<sup>b</sup> Key Laboratory of Organo-Pharmaceutical Chemistry of Jiangxi Province, College  
of Chemistry and Chemical Engineering, Gannan Normal University, Ganzhou  
341000, P. R. China. E-mail: luoxuzhong@hotmail.com

<sup>‡</sup> These authors contributed equally to this work.

## 1. Synthesis of compounds

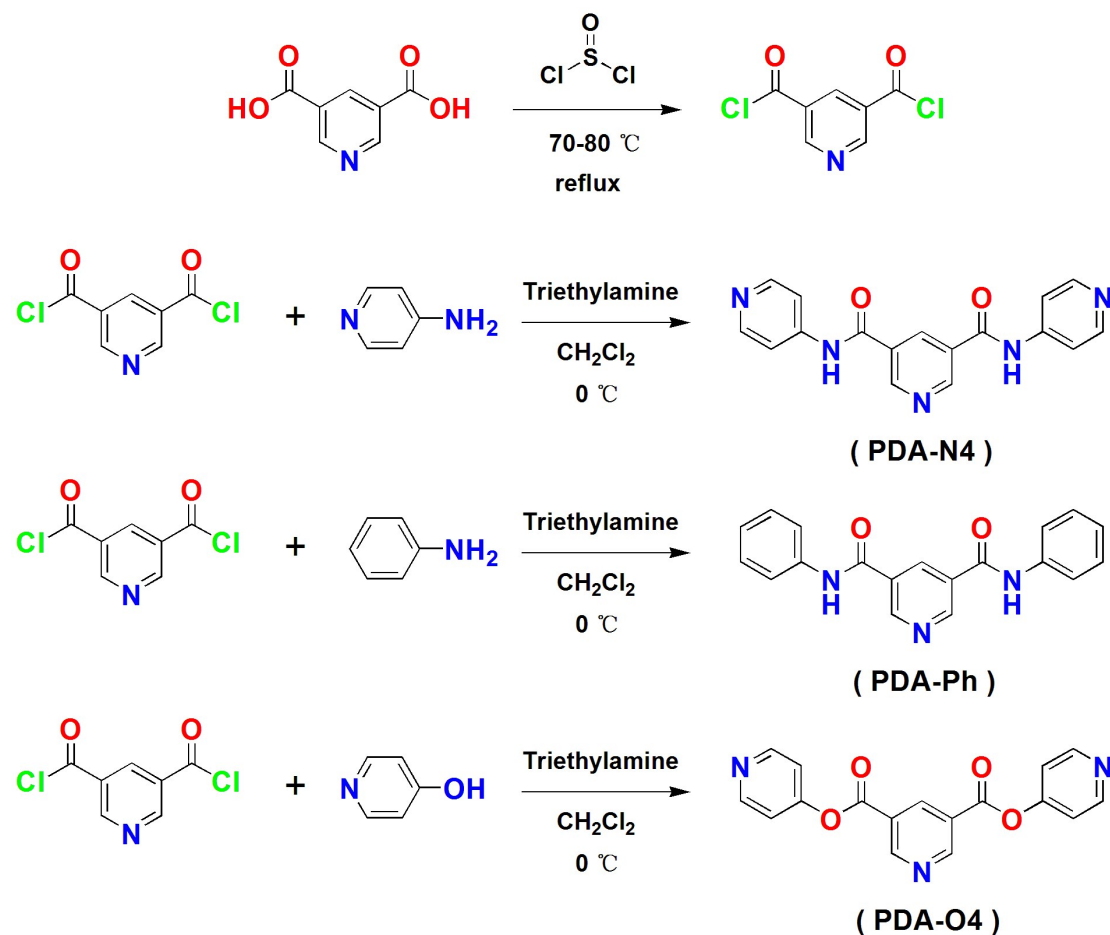

**Scheme S1.** Synthetic route for PDA-N4, PDA-Ph and PDA-O4

The pyridylamide derivative, PDA-N4, was prepared according to the literature method.<sup>1,2</sup> Other compounds (PDA-Ph and PDA-O4) were obtained similar to the PDA-N4 (Scheme S1). They were characterized by FT-IR,  $^1\text{H}$  NMR,  $^{13}\text{C}$  NMR and LC-MS, respectively.

In a typical experiment, 3,5-pyridinedicarboxylic acid (7.1945 g, 43.05 mmol) was added into  $\text{SOCl}_2$  (24 mL) in the presence of *N,N*-dimethylformamide (DMF, 0.1 mL), and then was stirred for 0.5 h at room temperature. The mixture was refluxed at  $75-80^\circ\text{C}$  for 6 h until all solid have been dissolved and reacted. Subsequently, the solvent was removed by reduced pressure distillation, and the remaining material was dried under vacuum. The corresponding acyl chloride was obtained as a solid at room temperature. Next, a freshly distilled THF (15mL) containing 3,5-pyridin-dicarbonyl dichloride (15 mmol, 3.075 g) was added dropwise to the THF solution (30 mL) of 4-

pyridylamine (30 mmol, 2.820g) and distilled triethylamine (43.1 mmol, 6 mL) at 0°C with continuous stirring. After stirring for 7h, the white precipitate was filtered and washed with THF for four times. The crude product was recrystallized from a mixed solvent of DMSO (100 mL) and H<sub>2</sub>O (200 mL), washed with H<sub>2</sub>O and dried at 80°C under vacuum (3.390 g, 70.8%).

***N,N'*-di(pyridin-4-yl)-pyridine-3,5-dicarboxamide (PDA-N4):**

<sup>1</sup>H NMR (400MHz, DMSO-*d*<sub>6</sub>, δ<sub>H</sub>): 9.30 (2H, d, *J* = 2.1 Hz), 8.83 (1H, t, *J* = 2.1 Hz), 8.59–8.44 (2 H, m), 7.79 (2H, dd, *J* = 4.8 Hz, 1.5 Hz). <sup>13</sup>C NMR (100MHz, DMSO-*d*<sub>6</sub>, δ<sub>C</sub>): 164.93, 152.22, 149.94, 146.92, 135.69, 129.89, 114.68. IR (KBr): 3240, 3157, 3070, 1680, 1594, 1515, 1419, 1335, 1230, 1253, 1208, 1107, 1059, 1031, 1000, 924, 886, 830, 730, 582, 539 cm<sup>-1</sup>. LC-MS [M+H]<sup>+</sup> calculated for C<sub>17</sub>H<sub>13</sub>N<sub>5</sub>O<sub>2</sub> : m/z 319.11; found: 320.12

***N,N'*-di(phenyl)-pyridine-3,5-dicarboxamide (PDA-Ph):**

Yield >75%

<sup>1</sup>H NMR (400MHz, DMSO-*d*<sub>6</sub>, δ<sub>H</sub>): 10.64 (2H, s), 9.28 (2H, s), 8.87 (1 H, d, *J* = 1.2 Hz), 7.82 (4H, d, *J* = 8.3 Hz), 7.40 (4H, t, *J* = 7.9 Hz), 7.15 (2H, t, *J* = 7.4 Hz). <sup>13</sup>C NMR (100MHz, DMSO-*d*<sub>6</sub>, δ<sub>C</sub>): 163.93, 151.48, 139.18, 135.21, 130.70, 129.24, 124.65, 120.87. IR (KBr): 3461, 3263, 3062, 1670, 1645, 1599, 1549, 1499, 1447, 1336, 1268, 1027, 883, 760, 743, 691, 584, 507 cm<sup>-1</sup>. LC-MS [M+H]<sup>+</sup> calculated for C<sub>19</sub>H<sub>15</sub>N<sub>3</sub>O<sub>2</sub> : m/z 317.12; found: 318.12.

***N,N'*-di(pyridin-4-yl)-pyridine-3,5-dicarbomethoxy (PDA-O4):**

Yield >80%

<sup>1</sup>H NMR (400MHz, DMSO-*d*<sub>6</sub>, δ<sub>H</sub>): 9.21 (2H, d, *J* = 2.1 Hz), 8.64 (1H, t, *J* = 2.1 Hz), 7.88 (4H, d, *J* = 7.4 Hz), 6.43 (4H, d, *J* = 7.3 Hz). <sup>13</sup>C NMR (100MHz, DMSO-*d*<sub>6</sub>, δ<sub>C</sub>): 176.54, 166.27, 153.72, 140.27, 137.73, 127.73, 116.33. IR (KBr): 3068, 1713, 1636, 1517, 1476, 1397, 1333, 1278, 1189, 1036, 848, 751, 704, 547 cm<sup>-1</sup>. LC-MS [M+H]<sup>+</sup> calculated for C<sub>17</sub>H<sub>11</sub>N<sub>3</sub>O<sub>4</sub> : m/z 321.29; found: 322.30.

**Table S1.** Solubility of PDA-N4, PDA-Ph and PDA-O4 in various solvents

|   | Solvents         | Compounds |        |        |
|---|------------------|-----------|--------|--------|
|   |                  | PDA-N4    | PDA-Ph | PDA-O4 |
| 1 | DMSO             | S         | S      | S      |
| 2 | DMF              | S         | S      | S      |
| 3 | Methanol         | S         | P      | S      |
| 4 | Ethanol          | S         | P      | S      |
| 5 | Benzene          | I         | I      | I      |
| 6 | CCl <sub>4</sub> | I         | I      | I      |
| 7 | THF              | I         | S      | P      |
| 8 | 1,4-Dioxane      | S         | S      | P      |
| 9 | H <sub>2</sub> O | I         | I      | P      |

\* S = solution; I = insoluble; P = precipitate.

**Table S2.** Gelation properties of PDA-N4, PDA-Ph and PDA-O4 in DMSO-H<sub>2</sub>O mixed solvents

|   | DMSO/H <sub>2</sub> O<br>(v/v) | Compounds |        |        |
|---|--------------------------------|-----------|--------|--------|
|   |                                | PDA-N4    | PDA-Ph | PDA-O4 |
| 1 | 10/90                          | G         | P      | P      |
| 2 | 20/80                          | G         | P      | S      |
| 3 | 30/70                          | G         | P      | S      |
| 4 | 40/60                          | G         | P      | S      |
| 5 | 50/50                          | G         | P      | S      |
| 6 | 60/40                          | TS        | P      | S      |
| 7 | 70/30                          | S         | P      | S      |
| 8 | 80/20                          | S         | S      | S      |
| 9 | 90/10                          | S         | S      | S      |

\* G = gel; C = crystal; S = solution; TS = turbid solution; P = precipitate; Gelator concentration: 15 mg·mL<sup>-1</sup>.

**Table S3.** Gel-crystal transition of PDA-N4 in DMSO-H<sub>2</sub>O mixed solvents upon aging time extension (90Day)

| DMSO/H <sub>2</sub> O<br>(v/v) | C <sub>PDA-N4</sub><br>mg·mL <sup>-1</sup> | States |    |      |      |     |     |     |     |
|--------------------------------|--------------------------------------------|--------|----|------|------|-----|-----|-----|-----|
|                                |                                            | 1D     | 2D | 5D   | 10D  | 15D | 30D | 60D | 90D |
| 50/50                          | 6                                          | S      | S  | S    | S    | S   | S   | S   | S   |
|                                | 9                                          | S      | S  | S    | S    | S   | S   | S   | S   |
|                                | 13                                         | TS     | TS | TS+C | TS+C | C   | C   | C   | C   |
|                                | 15                                         | G      | G  | G    | G+C  | G+C | C   | C   | C   |
|                                | 20                                         | G      | G  | G    | G    | G+C | G+C | C   | C   |
| 20/80                          | 6                                          | S      | S  | S    | S    | S   | S   | S   | S   |
|                                | 10                                         | TS     | TS | TS   | TS   | TS  | TS  | TS  | TS  |
|                                | 11                                         | G      | G  | G    | G    | G   | G   | G   | G   |
|                                | 15                                         | G      | G  | G    | G    | G   | G   | G   | G   |
|                                | 20                                         | G      | G  | G    | G    | G   | G   | G   | G   |
| 10/90                          | 6                                          | S      | S  | S    | S    | S   | S   | S   | S   |
|                                | 7                                          | TS     | TS | TS   | TS   | TS  | TS  | TS  | TS  |
|                                | 9                                          | G      | G  | G    | G    | G   | G   | G   | G   |
|                                | 12                                         | G      | G  | G    | G    | G   | G   | G   | G   |
|                                | 15                                         | G      | G  | G    | G    | G   | G   | G   | G   |
|                                | 20                                         | G      | G  | G    | G    | G   | G   | G   | G   |

\* G = gel; C = crystal; S = solution; TS = turbid solution.

**Table S4.** Gelation properties of PDA-N4, PDA-Ph and PDA-O4 in DMF-H<sub>2</sub>O mixed solvents

| DMF/H <sub>2</sub> O<br>(v/v) |       | Compounds |        |        |
|-------------------------------|-------|-----------|--------|--------|
|                               |       | PDA-N4    | PDA-Ph | PDA-O4 |
| 1                             | 10/90 | G         | P      | S      |
| 2                             | 20/80 | G         | P      | S      |
| 3                             | 30/70 | G         | P      | S      |
| 4                             | 40/60 | G         | P      | S      |
| 5                             | 50/50 | G         | P      | S      |
| 6                             | 60/40 | TS        | P      | S      |
| 7                             | 70/30 | TS        | P      | S      |
| 8                             | 80/20 | S         | S      | S      |
| 9                             | 90/10 | S         | S      | S      |

\* G = gel; C = crystal; S = solution; TS = turbid solution; P = precipitate; Gelator concentration: 15 mg·mL<sup>-1</sup>.

**Table S5.** Gelation properties of PDA-N4, PDA-Ph and PDA-O4 in methanol-H<sub>2</sub>O mixed solvents

| Methanol/H <sub>2</sub> O<br>(v/v) |       | Compounds |        |        |
|------------------------------------|-------|-----------|--------|--------|
|                                    |       | PDA-N4    | PDA-Ph | PDA-O4 |
| 1                                  | 10/90 | P         | P      | S      |
| 2                                  | 20/80 | P         | P      | S      |
| 3                                  | 30/70 | P         | P      | S      |
| 4                                  | 40/60 | P         | P      | S      |
| 5                                  | 50/50 | P         | P      | S      |
| 6                                  | 60/40 | P         | P      | S      |
| 7                                  | 70/30 | S         | P      | S      |
| 8                                  | 80/20 | S         | P      | S      |
| 9                                  | 90/10 | S         | P      | S      |

\* P = precipitate; S = solution; P = precipitate; Gelator concentration: 15 mg·mL<sup>-1</sup>.

**Table S6.** Gelation properties of PDA-N4, PDA-Ph and PDA-O4 in ethanol-H<sub>2</sub>O mixed solvents

| Ethanol/H <sub>2</sub> O<br>(v/v) |       | Compounds |        |        |
|-----------------------------------|-------|-----------|--------|--------|
|                                   |       | PDA-N4    | PDA-Ph | PDA-O4 |
| 1                                 | 10/90 | P         | P      | S      |
| 2                                 | 20/80 | P         | P      | S      |
| 3                                 | 30/70 | P         | P      | S      |
| 4                                 | 40/60 | P         | P      | S      |
| 5                                 | 50/50 | P         | P      | S      |
| 6                                 | 60/40 | P         | P      | S      |
| 7                                 | 70/30 | P         | P      | S      |
| 8                                 | 80/20 | S         | P      | S      |
| 9                                 | 90/10 | S         | P      | S      |

\* P = precipitate; S = solution; Gelator concentration: 15 mg·mL<sup>-1</sup>.

**Table S7.** Gelation properties of PDA-N4, PDA-Ph and PDA-O4 in 1, 4-dioxane-H<sub>2</sub>O mixed solvents

| 1, 4-dioxane/H <sub>2</sub> O<br>(v/v) |       | Compounds |        |        |
|----------------------------------------|-------|-----------|--------|--------|
|                                        |       | PDA-N4    | PDA-Ph | PDA-O4 |
| 1                                      | 10/90 | P         | P      | S      |
| 2                                      | 20/80 | P         | P      | S      |
| 3                                      | 30/70 | P         | P      | S      |
| 4                                      | 40/60 | P         | P      | S      |
| 5                                      | 50/50 | P         | P      | S      |
| 6                                      | 60/40 | S         | P      | S      |
| 7                                      | 70/30 | S         | P      | S      |
| 8                                      | 80/20 | S         | P      | S      |
| 9                                      | 90/10 | S         | P      | S      |

\* P = precipitate; S = solution; Gelator concentration: 15 mg·mL<sup>-1</sup>.

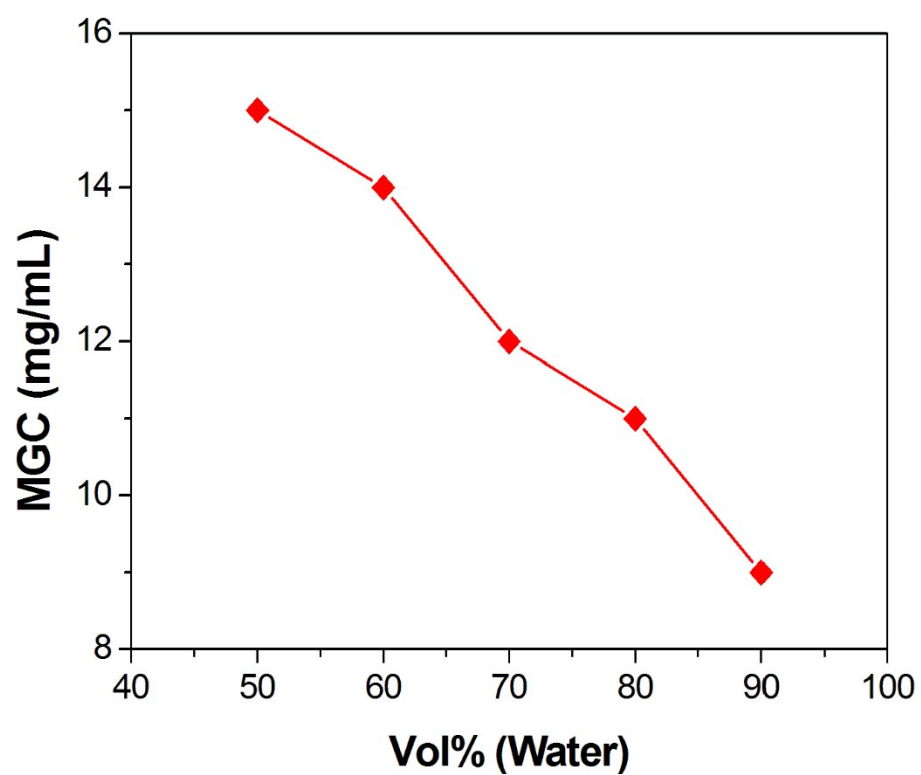

**Figure S1.** MGC variation of PDA-N4 with the water content in mixed solution



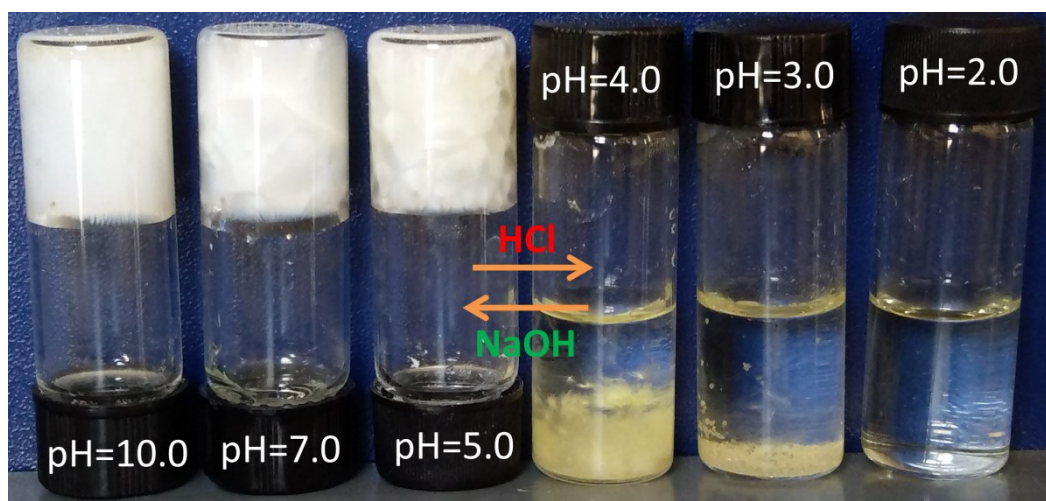

**Figure S2.** Gelation behavior of PDA-N4 under various pH conditions ( $V_{\text{DMSO}} : V_{\text{H}_2\text{O}} = 1 : 1$ ;  $c_{\text{PDA-N4}} = 15\text{mg}\cdot\text{mL}^{-1}$ )

**Table S8.** Crystal data and structure refinement for PDA-N4

| Compound                                             | PDA-N4                                                        |
|------------------------------------------------------|---------------------------------------------------------------|
| Formula                                              | C <sub>17</sub> H <sub>15</sub> N <sub>5</sub> O <sub>3</sub> |
| F.w.                                                 | 337.34                                                        |
| <i>T</i> (K)                                         | 100 (2)                                                       |
| Crystal system                                       | Monoclinic                                                    |
| Space group                                          | <i>P</i> 2 <sub>1</sub> / <i>c</i>                            |
| <i>a</i> (Å)                                         | 14.6401(3)                                                    |
| <i>b</i> (Å)                                         | 8.4503(2)                                                     |
| <i>c</i> (Å)                                         | 13.3398(3)                                                    |
| $\alpha$ (°)                                         | 90                                                            |
| $\beta$ (°)                                          | 112.159(3)                                                    |
| $\gamma$ (°)                                         | 90                                                            |
| <i>V</i> (Å <sup>3</sup> )                           | 1528.42(7)                                                    |
| <i>Z</i>                                             | 4                                                             |
| <i>D</i> <sub>c</sub> (g/cm <sup>3</sup> )           | 1.466                                                         |
| $\mu$ (mm <sup>-1</sup> )                            | 0.868                                                         |
| <i>R</i> <sub>int</sub>                              | 0.0938                                                        |
| GOF                                                  | 1.207                                                         |
| <i>R</i> 1, <i>wR</i> 2 [ <i>I</i> > 2σ( <i>I</i> )] | 0.1837, 0.4051                                                |
| <i>R</i> 1, <i>wR</i> 2 (all data)                   | 0.1897, 0.4077                                                |

**Table S9.** Hydrogen bond geometry (Å and °) for PDA-N4 crystal

| <b>D-H···A</b>                  | <b>d(D-H)</b> | <b>d(H···A)</b> | <b>d(D···A)</b> | <b>&lt; (DHA)</b> |
|---------------------------------|---------------|-----------------|-----------------|-------------------|
| O(2)-H(2B)···N(2) <sup>#1</sup> | 0.85          | 2.01            | 2.7596          | 146               |
| N(3)-H(3)···O(2)                | 0.86          | 1.99            | 2.8082          | 160               |
| N(6)-H(6)···N(5) <sup>#2</sup>  | 0.86          | 2.08            | 2.9327          | 169               |

#1 1-x,1/2+y,1/2-z; #2 -x,1-y,-z.

**Table S10.** Selected bond lengths (Å) and angles (°) for PDA-N4 crystal

|             |          |             |           |
|-------------|----------|-------------|-----------|
| O1—C11      | 1.228(7) | C10—C23     | 1.376(9)  |
| N2—C24      | 1.329(8) | C10—C15     | 1.400(8)  |
| N2—C19      | 1.348(7) | C11—C18     | 1.499(8)  |
| N3—C14      | 1.361(9) | C12—C17     | 1.405(8)  |
| N3—C15      | 1.397(8) | C13—C18     | 1.399(8)  |
| N4—C21      | 1.334(9) | C13—C16     | 1.413(8)  |
| N4—C20      | 1.356(7) | C14—C16     | 1.482(9)  |
| N5—C22      | 1.339(7) | C15—C25     | 1.405(10) |
| N5—C23      | 1.345(9) | C16—C21     | 1.380(10) |
| N6—C11      | 1.372(8) | C17—C24     | 1.396(8)  |
| N6—C12      | 1.410(8) | C18—C20     | 1.375(8)  |
| O7—C14      | 1.241(8) | C18—C20     | 1.375(8)  |
| C9—C19      | 1.371(8) | C22—C25     | 1.374(10) |
| C9—C12      | 1.407(8) |             |           |
|             |          |             |           |
| C24—N2—C19  | 117.1(5) | N3—C15—C25  | 118.6(5)  |
| C14—N3—C15  | 127.0(5) | C10—C15—C25 | 117.0(6)  |
| C21—N4—C20  | 116.2(6) | C21—C16—C13 | 117.6(6)  |
| C22—N5—C23  | 115.7(5) | C21—C16—C14 | 118.8(6)  |
| C11—N6—C12  | 126.1(5) | C13—C16—C14 | 123.5(6)  |
| C19—C9—C12  | 119.5(5) | C24—C17—C12 | 116.8(5)  |
| C23—C10—C15 | 118.3(6) | C20—C18—C13 | 119.4(5)  |
| N6—C11—C18  | 116.1(5) | C20—C18—C11 | 117.0(5)  |
| C17—C12—C9  | 118.4(5) | C13—C18—C11 | 123.6(5)  |
| C17—C12—N6  | 123.7(5) | N2—C19—C9   | 123.0(6)  |

|             |          |             |          |
|-------------|----------|-------------|----------|
| C9—C12—N6   | 117.9(5) | N4—C20—C18  | 123.5(6) |
| C18—C13—C16 | 117.8(6) | N4—C21—C16  | 125.4(6) |
| O7—C14—N3   | 123.2(6) | N5—C22—C25  | 124.0(6) |
| O7—C14—C16  | 119.8(6) | N5—C23—C10  | 125.3(5) |
| N3—C14—C16  | 116.9(5) | N2—C24—C17  | 125.2(5) |
| N3—C15—C10  | 124.3(6) | C22—C25—C15 | 119.6(6) |

---

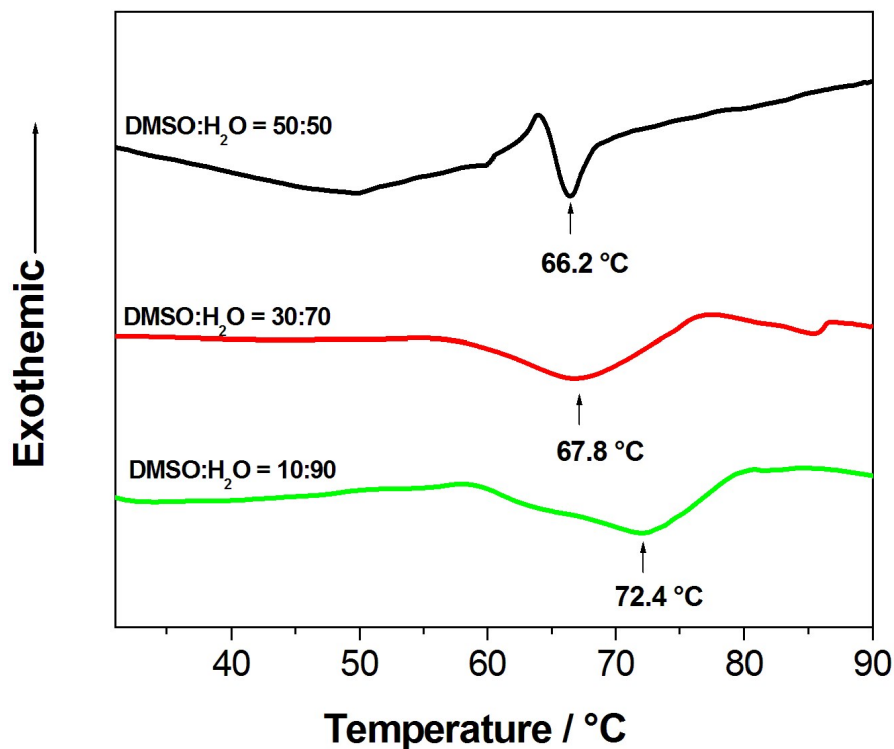

**Figure S3.** DSC curves for the PDA-N4 gels at different solvent ratios ( $C_{\text{PDA-N4}} = 15 \text{ mg} \cdot \text{mL}^{-1}$ ).

When 50% water (volume fraction) was added, a gel obtained and the gel-to-sol transition temperature ( $T_{\text{gel}}$ ) was 66.2 °C. The higher  $T_{\text{gel}}$  (66.2 °C),  $T_{\text{gel}}$  (72.4 °C) were found when the water content reached 70% and 90%, respectively. It can be clearly seen that the  $T_{\text{gel}}$  increased as the H<sub>2</sub>O content was increased, showing that the solvent ratio plays a significant role to the thermal stability of the supramolecular gel.

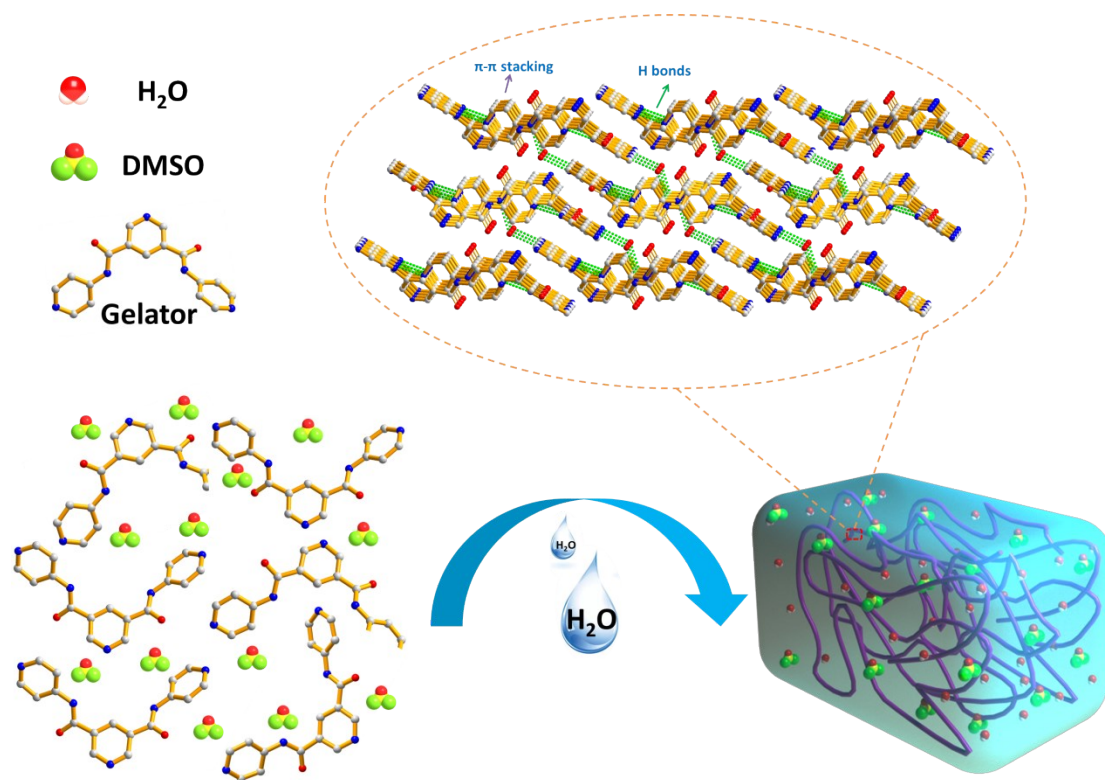

**Figure S4.** Schematic of the self-assembly mechanism for PDA-N4 in gels

## 2. References

- 1 X. Luo, X. Jia, J. Deng, J. Zhong, H. Liu, K. Wang and D. Zhong, *J. Am. Chem. Soc.*, 2013, **135**, 11684-11687.
- 2 Y. Zhao, M. Lv, J. Fan, L. Luo, Z. Su, W. Sun, *Inorg. Chim. Acta*, 2011, **377**, 138–143.
